# Supplementary material for: Zr doped mesoporous LaTaON2 for efficient photocatalytic water splitting
Source: Royal Society of Chemistry journal article supplement (doi:10.1039/c8ta11561c), 2019-01-01
Supplement: c8ta11561c1.pdf [file c8ta11561c1.pdf]

## Supplementary Information

### Zr doped mesoporous LaTaON<sub>2</sub> for efficient photocatalytic water splitting

Yawei Wang<sup>a,c,‡</sup>, Shu Jin<sup>a,‡</sup>, Guoxiang Pan<sup>b</sup>, Zuxin Li<sup>b</sup>, Long Chen<sup>c</sup>, Gang Liu<sup>\*d</sup>  
and Xiaoxiang Xu,<sup>\*a,b,c</sup>

*<sup>a</sup>Clinical and Central Lab, Putuo People's Hospital, Tongji University, 1291  
Jiangning Road, Shanghai, 200060, China*

*<sup>b</sup>Department of Materials Engineering, Huzhou University, Huzhou 313000, China*

*<sup>c</sup>Shanghai Key Lab of Chemical Assessment and Sustainability, School of Chemical  
Science and Engineering, Tongji University, 1239 Siping Road, Shanghai, 200092,  
China, \*Email: [xxu@tongji.edu.cn](mailto:xxu@tongji.edu.cn), telephone: +86-21-65986919*

*<sup>d</sup>Shenyang National laboratory for Materials Science, Institute of Metal Research,  
Chinese Academy of Science, 72 Wenhua Road, Shenyang 110016, China, \*Email:  
[gangliu@imr.ac.cn](mailto:gangliu@imr.ac.cn)*

‡ These authors contribute equally.

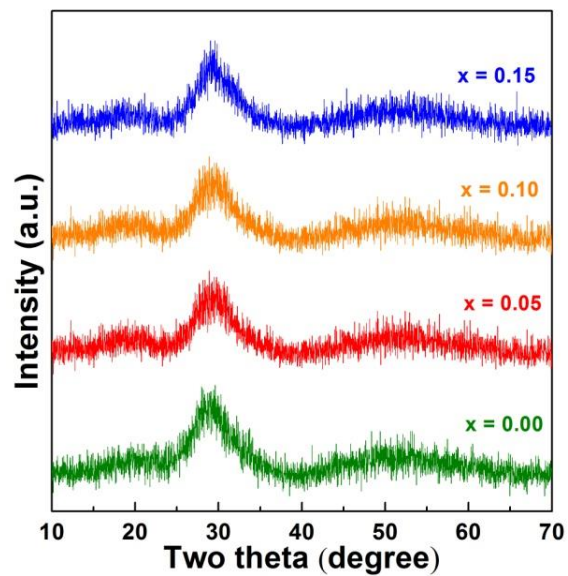

Figure S1. X-ray powder diffraction patterns of all oxide precursors.

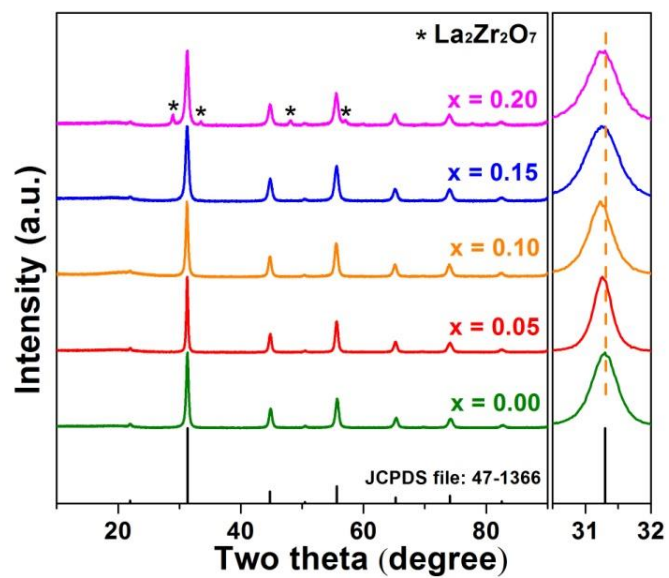

Figure S2. X-ray powder diffraction patterns of  $\text{LaTa}_{1-x}\text{Zr}_x\text{O}_{1+y}\text{N}_{2-y}$  ( $0 \leq x \leq 0.20$ ), peaks of  $\text{La}_2\text{Zr}_2\text{O}_7$  are marked by asterisks (\*).

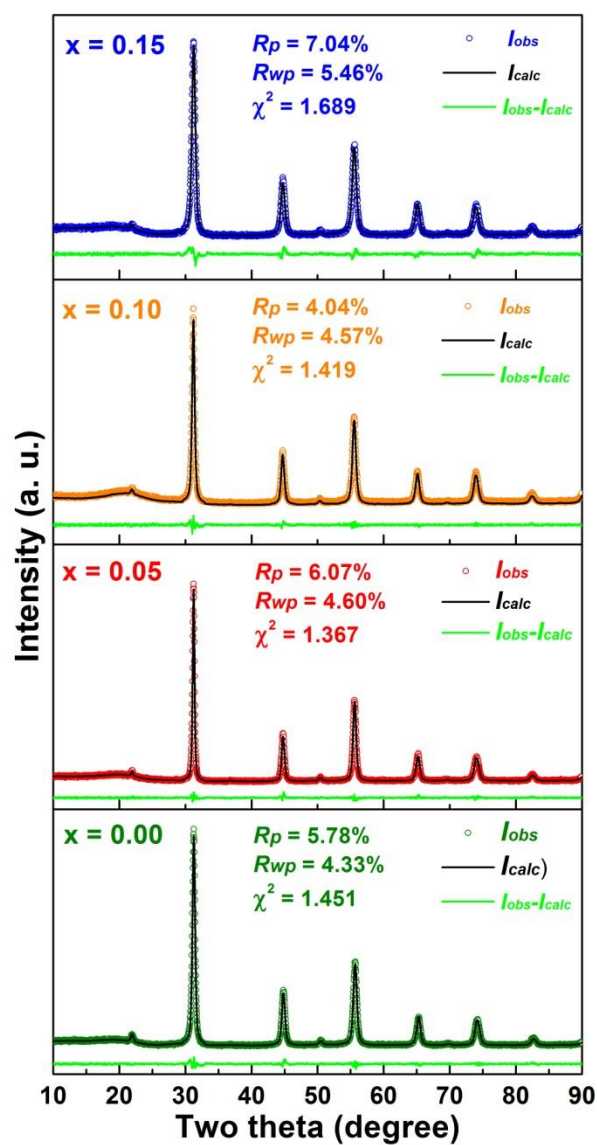

Figure S3. Observed and calculated X-ray powder diffraction patterns of all samples using the  $I2/m$  space group, the refinement converges with good  $R$  and  $\chi^2$  factor values of all samples are inserted.

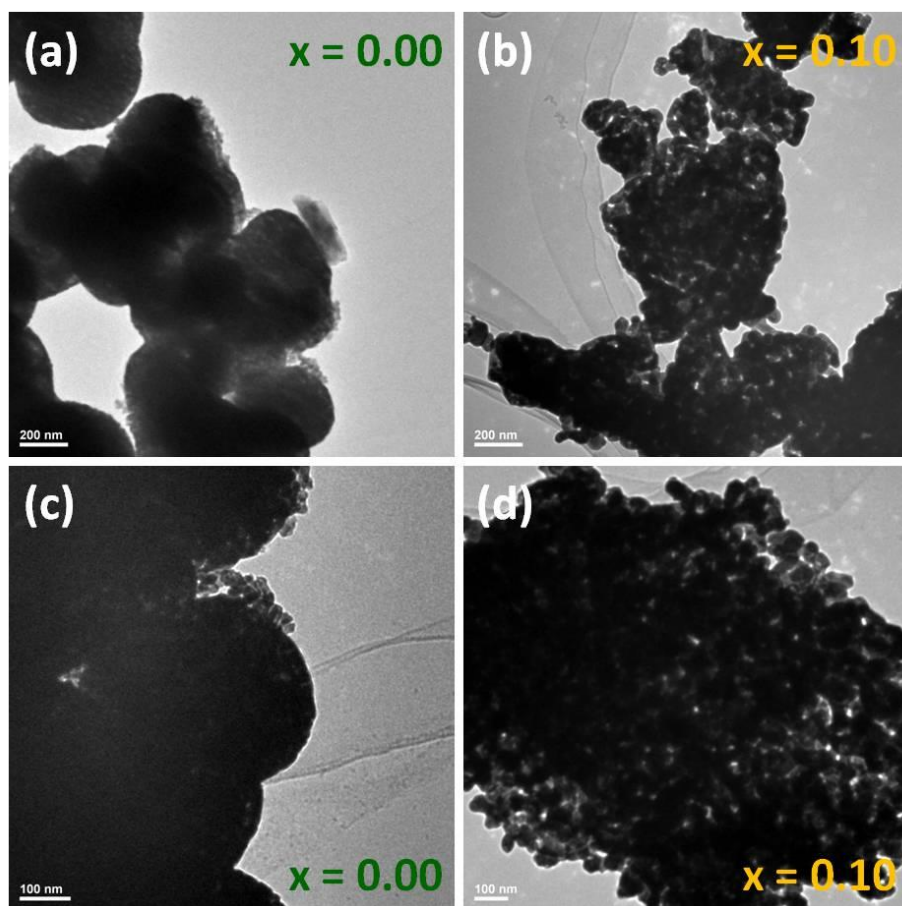

Figure S4. TEM images of freshly prepared sample powders of (a, c) pristine LaTaON<sub>2</sub> ( $x = 0.00$ ) and (b, d) LaTa<sub>0.9</sub>Zr<sub>0.1</sub>O<sub>1+y</sub>N<sub>2-y</sub> ( $x = 0.10$ ) at different magnifications.

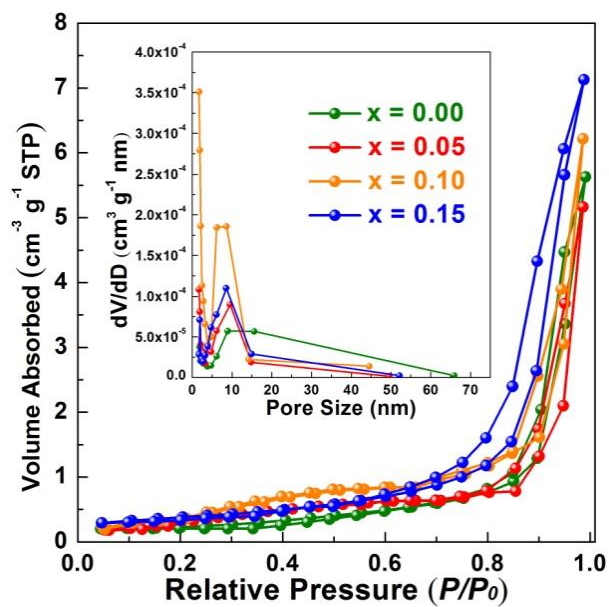

Figure S5. Nitrogen adsorption-desorption isotherms of freshly prepared sample powders  $\text{LaTa}_{1-x}\text{Zr}_x\text{O}_{1+y}\text{N}_{2-y}$  ( $0 \leq x \leq 0.15$ ), the pore-size distribution curves is inserted.

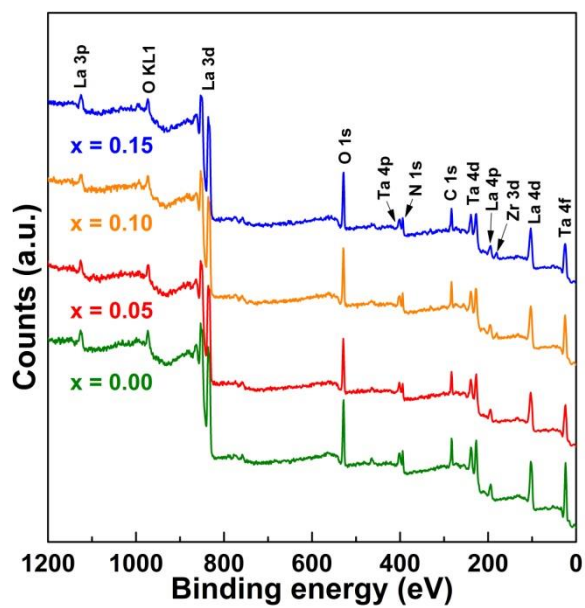

Figure S6. XPS survey spectra of all samples.

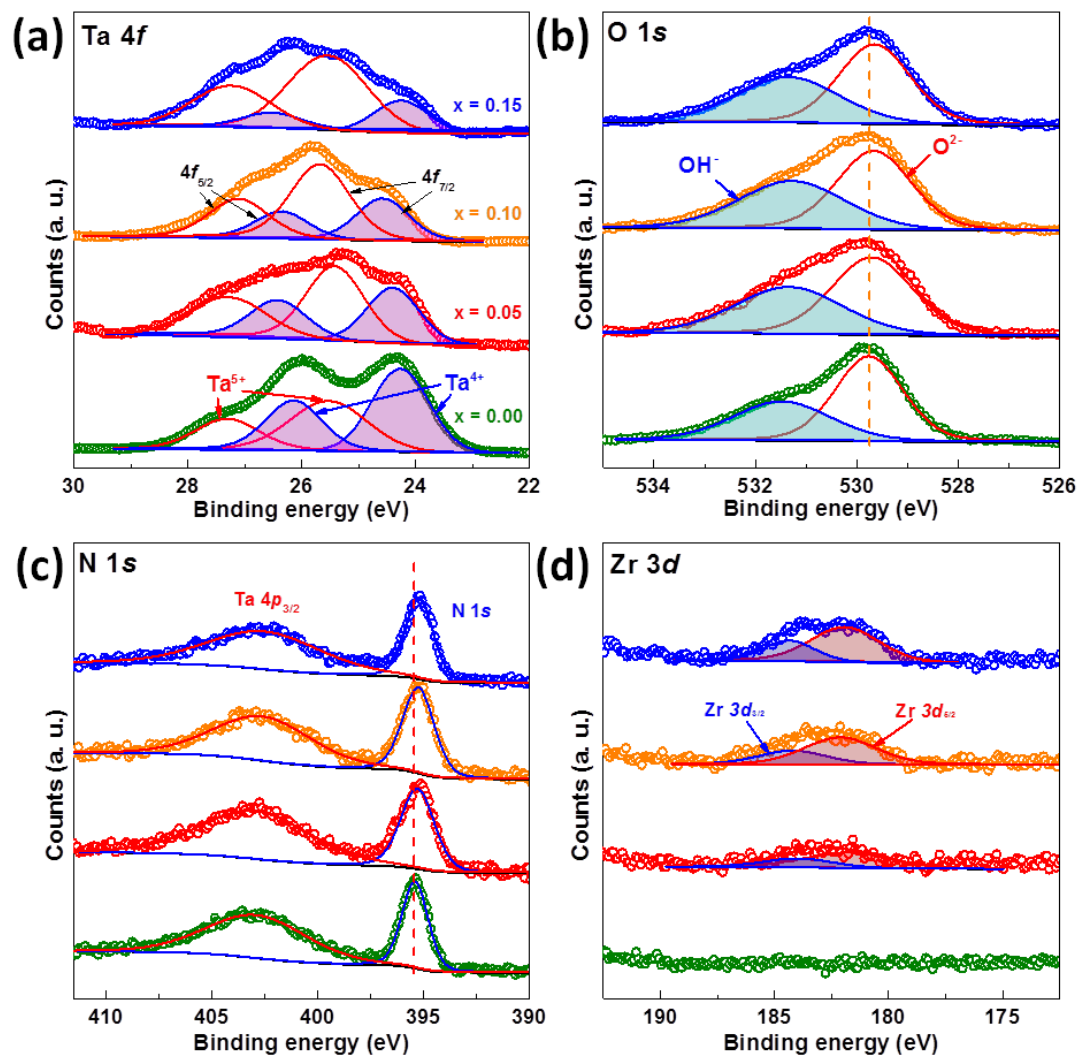

Figure S7. X-ray photoelectron spectra of core-level electrons of constituent elements in all sample powders  $\text{LaTa}_{1-x}\text{Zr}_x\text{O}_{1+y}\text{N}_{2-y}$  ( $0 \leq x \leq 0.15$ ): (a) Ta 4f; (b) O 1s; (c) N 1s; (d) Zr 3d.

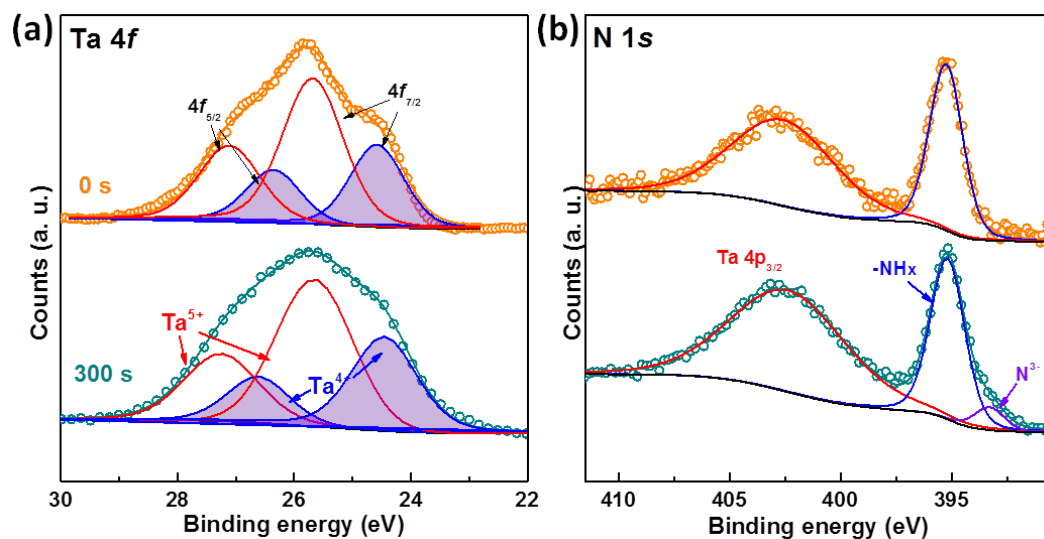

Figure S8. X-ray photoelectron spectra of (a) Ta 4f and (b) N 1s state *after in situ* Ar ion sputtering LaTa<sub>0.9</sub>Zr<sub>0.1</sub>O<sub>1+y</sub>N<sub>2-y</sub> (x = 0.10) with beam energy of 4 keV for 300 s.



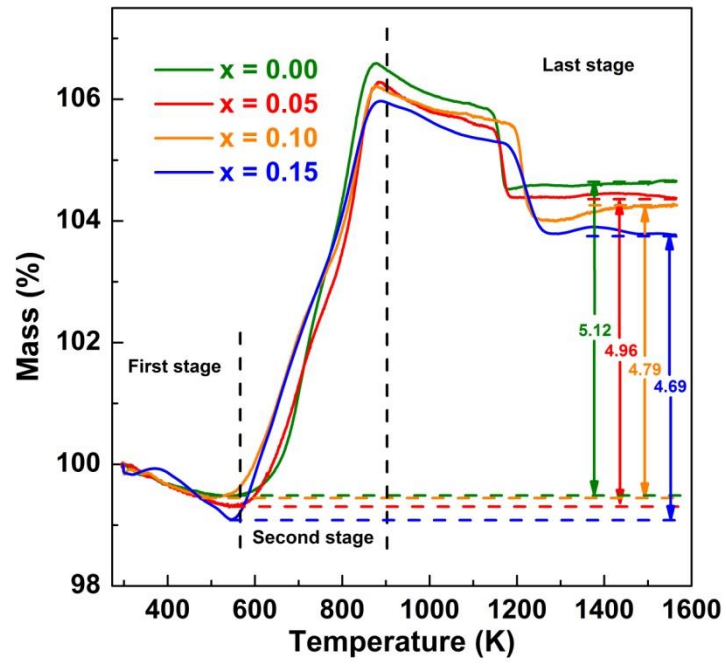

Figure S9. TG curves of LaTa<sub>1-x</sub>Zr<sub>x</sub>O<sub>1+y</sub>N<sub>2-y</sub> ( $0 \leq x \leq 0.15$ ) powders in air with heating rate of  $10 \text{ K min}^{-1}$  from 273 K to 1573 K. All TGA curves can be divided into three regions like previous reports<sup>1-4</sup>.

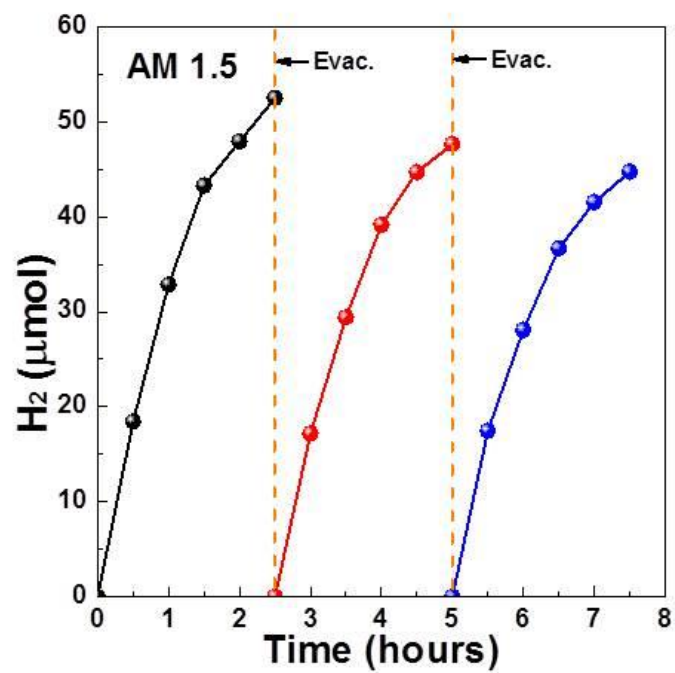

Figure S10. Time courses of hydrogen evolution on  $\text{LaTa}_{0.9}\text{Zr}_{0.1}\text{O}_{1+y}\text{N}_{2-y}$  ( $x = 0.10$ ) under AM 1.5 irradiation.

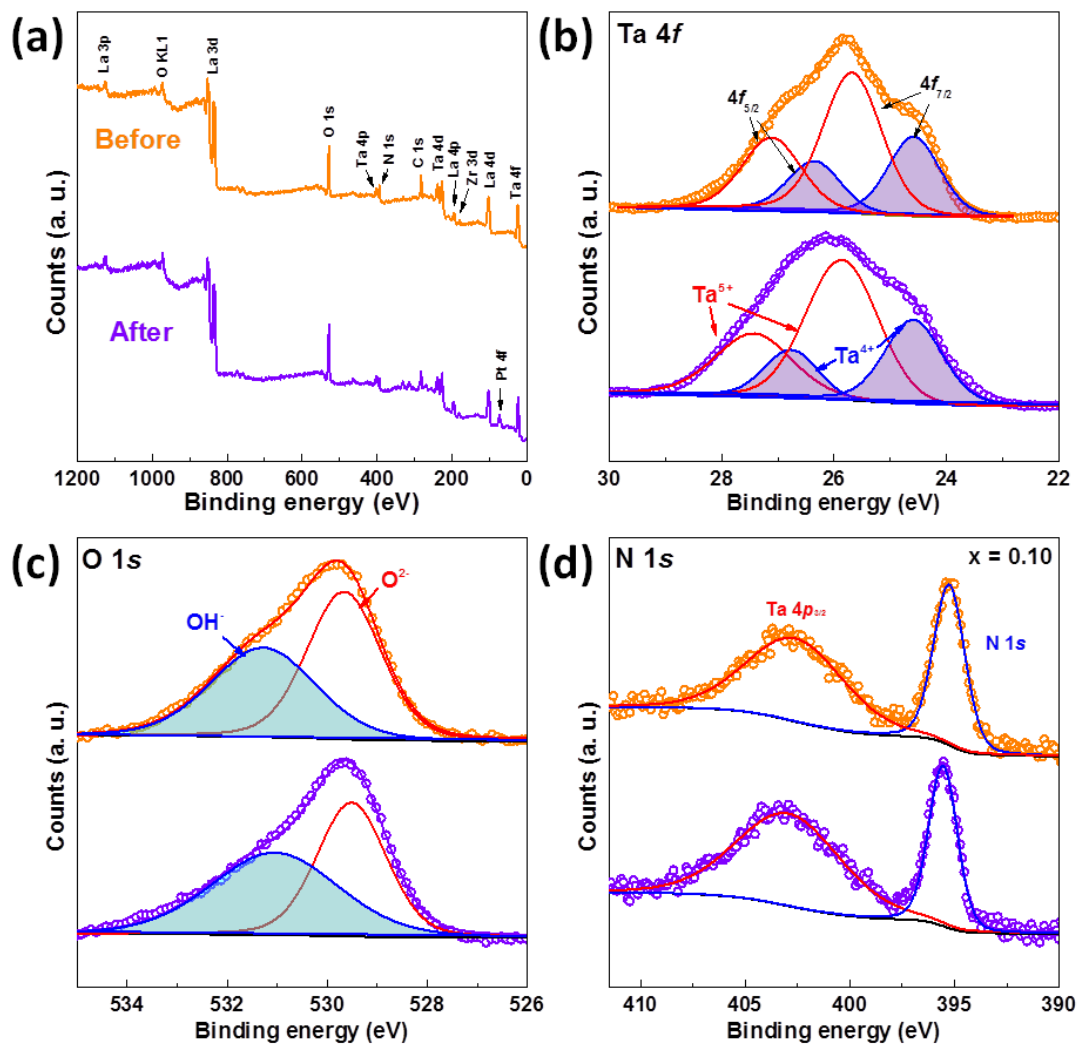

Figure S11. (a) XPS survey spectra and X-ray photoelectron spectra of (b) Ta 4f; (c) O 1s; (d) N 1s in  $\text{LaTa}_{0.9}\text{Zr}_{0.1}\text{O}_{1+y}\text{N}_{2-y}$  ( $x = 0.10$ ) before and after photocatalytic water reduction reaction.

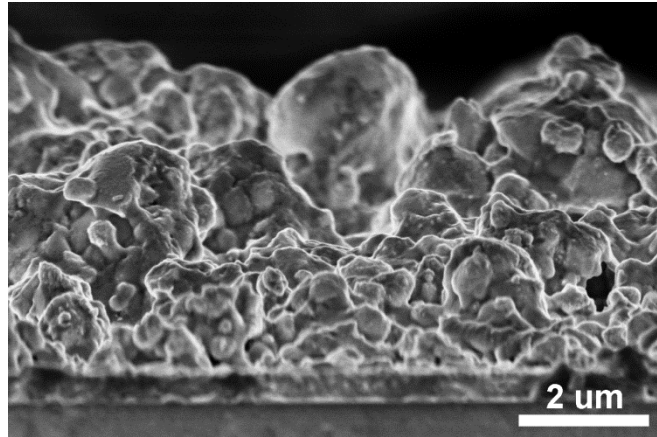

Figure S12. Field emission scanning electron microscopy image of LaTa<sub>0.9</sub>Zr<sub>0.1</sub>O<sub>1+y</sub>N<sub>2-y</sub> (x = 0.10) electrode.

Table S1. The refined atomic coordinates and site occupancies of as-prepared samples

LaTa<sub>1-x</sub>Zr<sub>x</sub>O<sub>1+y</sub>N<sub>2-y</sub> ( $0 \leq x \leq 0.15$ )

| Sample | Element | x         | y         | z         | Occupancy |
|--------|---------|-----------|-----------|-----------|-----------|
| 0.00   | La1     | 0.7601(1) | 0         | 0.2473(3) | 1         |
|        | Ta1     | 0.75      | 0.25      | 0.75      | 1         |
|        | O1      | 0.7130(1) | 0         | 0.6983(2) | 0.63      |
|        | N1      | 0.7130(1) | 0         | 0.6983(2) | 0.37      |
|        | N2      | 0         | 0.7401(1) | 0         | 1         |
|        | O2      | 0.5       | 0.2550(2) | 0         | 0.37      |
|        | N3      | 0.5       | 0.2550(2) | 0         | 0.63      |
| 0.05   | La1     | 0.7591(2) | 0         | 0.2479(2) | 1         |
|        | Ta1     | 0.75      | 0.25      | 0.75      | 0.95      |
|        | Zr1     | 0.75      | 0.25      | 0.75      | 0.05      |
|        | O1      | 0.7112(3) | 0         | 0.6985(2) | 0.655     |
|        | N1      | 0.7112(3) | 0         | 0.6985(2) | 0.345     |
|        | N2      | 0         | 0.7561(3) | 0         | 1         |
|        | O2      | 0.5       | 0.2630(1) | 0         | 0.395     |
| N3     | 0.5     | 0.2630(1) | 0         | 0.605     |           |
| 0.10   | La1     | 0.7597(2) | 0         | 0.2475(1) | 1         |
|        | Ta1     | 0.75      | 0.25      | 0.75      | 0.9       |
|        | Zr1     | 0.75      | 0.25      | 0.75      | 0.1       |
|        | O1      | 0.7123(3) | 0         | 0.6986(4) | 0.68      |

|       |     |           |           |           |        |
|-------|-----|-----------|-----------|-----------|--------|
|       | N1  | 0.7123(3) | 0         | 0.6986(4) | 0.32   |
|       | N2  | 0         | 0.7432(1) | 0         | 1      |
|       | O2  | 0.5       | 0.2608(7) | 0         | 0.42   |
|       | N3  | 0.5       | 0.2608(7) | 0         | 0.58   |
| <hr/> |     |           |           |           |        |
|       | La1 | 0.7587(1) | 0         | 0.2483(3) | 1      |
|       | Ta1 | 0.75      | 0.25      | 0.75      | 0.85   |
|       | Zr1 | 0.75      | 0.25      | 0.75      | 0.15   |
| 0.15  | O1  | 0.7070(2) | 0         | 0.6989(3) | 0.7050 |
|       | N1  | 0.7070(2) | 0         | 0.6989(3) | 0.2950 |
|       | N2  | 0         | 0.7531(2) | 0         | 1      |
|       | O2  | 0.5       | 0.2650(2) | 0         | 0.445  |
|       | N3  | 0.5       | 0.2650(2) | 0         | 0.555  |
| <hr/> |     |           |           |           |        |

Table S2. Surface elemental compositions measured by XPS for as-prepared samples.

| $x$  | La (at.%) | Ta (at.%) | Zr (at.%) | O (at.%) | N (at.%) | O/N  |
|------|-----------|-----------|-----------|----------|----------|------|
| 0.00 | 19.04     | 14.79     | -         | 50.94    | 15.23    | 3.34 |
| 0.05 | 19.12     | 14.35     | 1.25      | 50.28    | 15.00    | 3.35 |
| 0.10 | 18.77     | 14.25     | 2.19      | 50.12    | 14.67    | 3.41 |
| 0.15 | 19.40     | 13.92     | 2.72      | 51.37    | 12.59    | 4.08 |

Table S3. The binding energy (BE), peak area ratio (PAR) and full width at half maximum (FWHM) of Ta 4f<sub>7/2</sub> and 4f<sub>5/2</sub> by peak-fitting XPS spectra in all samples

| x     | Ta 4f <sub>5/2</sub> |               |             | Ta 4f <sub>7/2</sub> |               |             |
|-------|----------------------|---------------|-------------|----------------------|---------------|-------------|
|       | BE (eV)              | PAR (%)       | FWHM (eV)   | BE (eV)              | PAR (%)       | FWHM (eV)   |
| 0.00  | 27.33 / 26.12        | 18.49 / 24.36 | 1.33 / 1.34 | 25.51 / 24.25        | 24.66 / 32.49 | 1.43 / 1.45 |
| 0.05  | 27.36 / 26.47        | 25.00 / 17.85 | 1.45 / 1.32 | 25.68 / 24.55        | 33.34 / 23.81 | 1.34 / 1.35 |
| 0.10  | 27.10 / 26.36        | 31.23 / 11.63 | 1.35 / 1.27 | 25.69 / 24.60        | 41.63 / 15.51 | 1.37 / 1.23 |
| 0.15  | 27.25 / 26.54        | 33.75 / 9.11  | 1.55 / 1.25 | 25.55 / 24.28        | 45.00 / 12.14 | 1.58 / 1.26 |
| After | 27.43 / 26.77        | 28.44 / 14.42 | 1.51 / 1.23 | 25.86 / 24.60        | 37.92 / 19.22 | 1.53 / 1.24 |
| 300 s | 27.28 / 26.65        | 27.10 / 15.76 | 1.54 / 1.34 | 25.69 / 24.46        | 36.13 / 21.01 | 1.56 / 1.36 |



Table S4. Expected and measured mass changes of as-prepared samples

$\text{LaTa}_{1-x}\text{Zr}_x\text{O}_{1+y}\text{N}_{2-y}$  ( $0 \leq x \leq 0.15$ ).

| x    | Expected mass changes | Measured mass changes |
|------|-----------------------|-----------------------|
| 0.00 | 5.49%                 | 5.12%                 |
| 0.05 | 5.43%                 | 4.96%                 |
| 0.10 | 5.34%                 | 4.79%                 |
| 0.15 | 5.27%                 | 4.69%                 |

## References

1. Y. W. Wang, D. Z. Zhu and X. X. Xu, *ACS Appl. Mater. Interfaces*, 2016, **8**, 35407-35418.
2. D. Li, W. J. Li, C. Fasel, J. Shen and R. Riedel, *J. Alloy. Compd.*, 2014, **586**, 567-573.
3. A. Rachel, S. G. Ebbinghaus, M. Gungerich, P. J. Klar, J. Hanss, A. Weidenkaff and A. Reller, *Thermochim. Acta*, 2005, **438**, 134-143.
4. R. Aguiar, D. Logvinovich, A. Weidenkaff, A. Reller and S. G. Ebbinghaus, *Thermochim. Acta*, 2008, **471**, 55-60.
